# Supplementary material for: Self-organized graphene-like boron nitride containing nanoflakes on copper by low-temperature N2 + H2 plasma
Source: Royal Society of Chemistry journal article supplement (doi:10.1039/c6ra17940a), 2016-01-01
Supplement: c6ra17940a1.pdf [file c6ra17940a1.pdf]

## Electronic Supplementary Information

# Self-organized graphene-like boron nitride containing nanoflakes on copper by low-temperature N<sub>2</sub>+H<sub>2</sub> plasma

B. B. Wang<sup>a</sup>, D. Gao<sup>b</sup>, I. Levchenko<sup>c</sup>, K. Ostrikov<sup>d</sup>, M. Keidar<sup>e</sup>, M. K. Zhu<sup>f</sup>, K. Zheng<sup>b</sup> and B. Gao<sup>g</sup>

- 
- <sup>a</sup>. *College of Chemistry and Chemical Engineering, Chongqing University of Technology, 69 Hongguang Rd, Lijiatio, Banan District, Chongqing 400054, P. R. China.*
- <sup>b</sup>. *Institute of Microstructure and Properties of Advanced Materials, Beijing University of Technology, Beijing 100124, P. R. China.*
- <sup>c</sup>. *School of Chemistry, Physics and Mechanical Engineering, Queensland University of Technology, Brisbane QLD 4000, Australia. E-mail: [Igor.Levchenko@qut.edu.au](mailto:Igor.Levchenko@qut.edu.au).*
- <sup>d</sup>. *Institute for Future Environments and School of Chemistry, Physics and Mechanical Engineering, Queensland University of Technology, Brisbane QLD 4000, Australia; CSIRO-QUT Joint Sustainable Materials and Devices Laboratory, Commonwealth Scientific and Industrial Research Organization, P.O. Box 218, Lindfield NSW 2070, Australia; Plasma Nanoscience, School of Physics, The University of Sydney, Sydney NSW 2006, Australia.*
- <sup>e</sup>. *Mechanical and Aerospace Engineering, The George Washington University, Washington DC 20052, USA.*
- <sup>f</sup>. *College of Materials Science and Engineering, Beijing University of Technology, Beijing 100124, P. R. China.*
- <sup>g</sup>. *College of Computer Science, Chongqing University, Chongqing 400044, P. R. China; Chongqing Municipal Education Examinations Authority, Chongqing 401147, China*

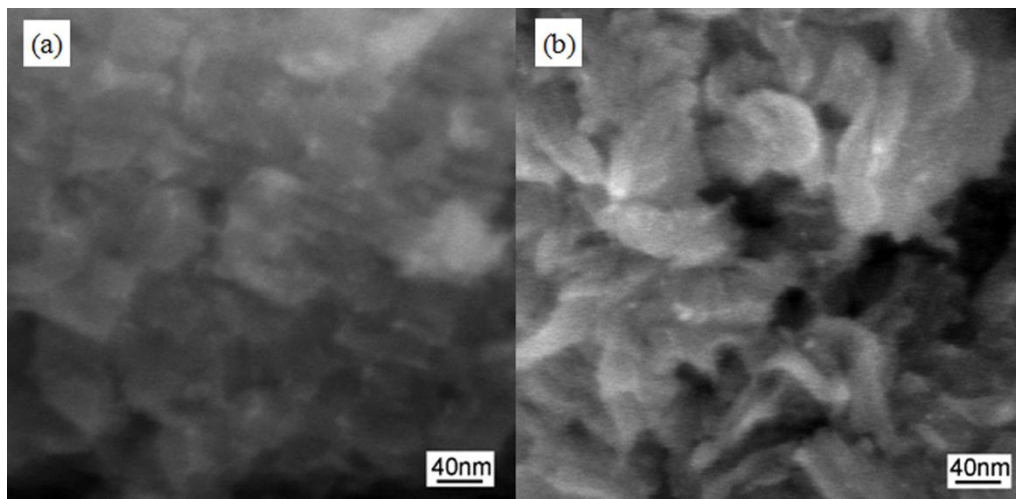

**Fig. S1** FESEM images of the two samples with successfully synthesised two-dimensional BNCO nanoflakes. The growth durations was 20 min.

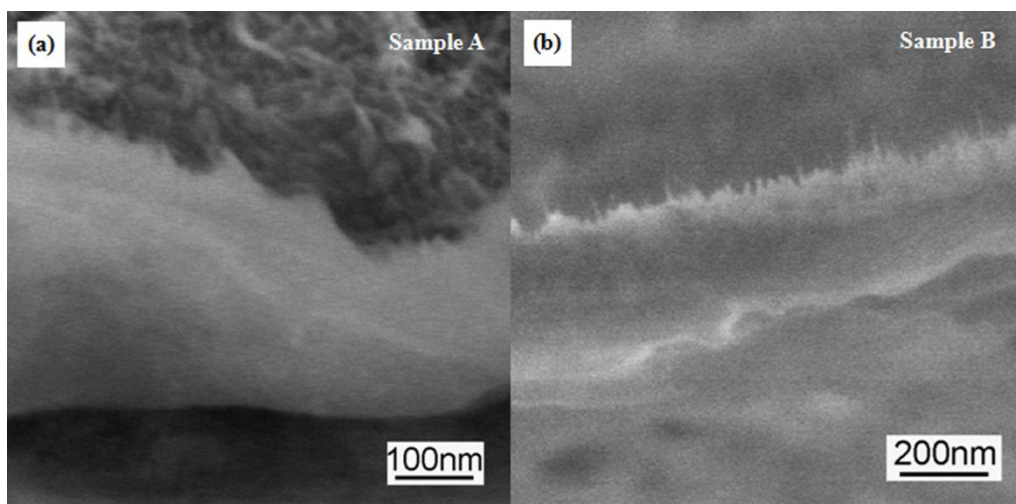

**Fig. S2** Section FESEM images of samples A and B

Fig. S2 shows the section FESEM images of samples A and B. From Fig. S2 we have obtained the average thicknesses of films, which are about 172 and 284 nm for samples A and B, respectively.
